# Supplementary material
Source: publisher figshare collection journal article supplement (https://geolsoc.figshare.com/ndownloader/files/28842976)
Supplement: Supplementary file 1 [file 28842976]

## Sheet: Feuil1
	sample name	alteration intens.	protolith	mineral 1	mineral 2	mineral 3	mixed samples	SiO2 (wt%)	Al2O3 (wt%)	Fe2O3T (wt%)	MnO (wt%)	MgO (wt%)	CaO (wt%)	Na2O (wt%)	K2O (wt%)	TiO2 (wt%)	P2O5 (wt%)	NiO (wt%)	CoO (wt%)	Cr2O3 (wt%)	SO3 (wt%)	LOI (wt%)	Total oxides	Sc ppm
	REAL SAMPLES
	BS-2014-06B	moderate	pyroxenite	Al-goethite	gibbsite	kaolinite		30.78	6.86	37.67	0.53	6.47	1.13	0.07	bld	0.27	bld	0.17	0.02	0.62	0.01	14.92	99.56	144.6
	BS-2014-06C	moderate	pyroxenite	Al-goethite	gibbsite	kaolinite		32.21	6	35.13	0.55	10.25	2.79	0.14	bld	0.35	bld	0.15	0.02	0.81	0.01	11.07	99.5	192.9
	BS-2014-06D	high	pyroxenite	Al-goethite	gibbsite	kaolinite		16.08	7.45	55.89	0.75	3.58	0.27	0.04	bld	0.34	bld	0.23	0.04	0.83	0.01	13.54	99.09	161.7
	BS-2014-07	high	pyroxenite	Al-goethite	gibbsite	kaolinite		30.01	23.61	24.54	0.27	1.94	0.25	0.1	0.07	2.01	bld	0.3	0.03	0.24	0.05	16.75	100.22	251.7
	NAEU-03	very high	harzburgite	goethite	hematite			2.54	4.1	67.56	2.91	0.51	0.09	bld	0.03	0.04	bld	2.23	0.45	3.93	0.7	16.37	101.48	75.1
	NAJO-01	unweathered	amphibolite	hornblende	enstatite			42.98	11.11	12.34	0.1	16.39	10.08	2.19	0.15	1.35	bld	0.17	0	0.01	0.01	2.14	99.06	128.8
	NAJO-02	weak	amphibolite	hornblende	enstatite			30.81	14.71	27.86	0.19	8.28	4.91	0.86	0.09	2.36	bld	0.21	0.03	0.03	0.05	8.86	99.28	211.9
	NAME-08	high	harzburgite	goethite	hematite	lizardite		10.29	5.98	53.79	4.86	1.68	0.09	0.43	bld	0.09	bld	2.33	1.29	2.88	0.5	15.8	100.04	59.4
	NAXD-01	moderate	harzburgite	goethite	lizardite			20.92	3.14	44.71	0.29	11.52	0.39	0.02	bld	0.03	bld	2.16	0.1	2.34	0.01	13.97	99.66	43.8
	NAXD-17	unweathered	amphibolite	hornblende	enstatite			45.88	4.43	7.37	0.13	22.23	10.53	0.32	0.03	0.24	bld	0.75	bld	0.42	0.02	6.31	98.71	74.6
	NGAD-14	very high	dunite	goethite	hematite			2.44	4.08	67.39	2.12	0.53	0.03	bld	bld	bld	bld	2.45	0.35	4.28	0.7	16.44	100.84	52
	NGOU-02	unweathered	amphibolite	hornblende	enstatite			44.17	9.94	10.04	0.1	19.23	9.53	1.74	0.14	1.02	bld	0.26	bld	0.11	0.01	3.79	100.14	103.1
	NGPB-01	unweathered	amphibolite	hornblende	enstatite			48.06	7.42	12.34	0.15	19.48	8.65	1.49	0.11	0.76	bld	0.15	bld	0.24	0.01	1.33	100.24	101.3
	NGPB-02	high	amphibolite	Al-goethite	gibbsite	kaolinite		20.13	19.48	35.68	0.19	1.88	0.51	0.1	bld	1.59	bld	0.38	0.01	1.72	0.07	18.31	100.09	168.5
	NGPB-03	high	amphibolite	Al-goethite	gibbsite	kaolinite		17.39	23.9	31.98	1.04	0.22	0.05	bld	bld	2.31	bld	0.55	0.15	0.83	0.35	21	99.8	314.8
	NGPB-04	high	harzburgite	goethite	hematite			7.47	3.66	65.57	0.82	2.14	0.14	bld	bld	0.07	bld	1.86	0.09	3.35	0.22	15.08	100.52	79.5
	NGPB-09	high	amphibolite	Al-goethite	gibbsite	kaolinite		5.72	29.04	38.6	0.09	0.24	bld	0.06	bld	2.76	0.18	0.18	0.01	1.91	0.42	21.58	100.83	185.9
	NGPB-10	moderate	amphibolite	Al-goethite	gibbsite	kaolinite		35.92	8.18	32.65	0.51	4.97	1.96	0.36	0.04	0.86	bld	1.24	0.07	1.34	0.12	11.25	99.51	117.5
	NGPB-12	very high	amphibolite	Al-goethite	hematite			0.9	8.83	70.55	0.61	0.11	0.07	bld	bld	0.42	bld	0.31	0.03	3.02	0.65	15.19	100.72	95.1
	NGRI-01	unweathered	amphibolite	hornblende	enstatite			46.04	9.86	11.71	0.12	15.84	10.27	1.84	0.15	0.98	bld	0.16	bld	0.09	0.01	2.46	99.58	116.9
	NGRI-05	weak	amphibolite	hornblende	enstatite			43.46	11.63	13.88	0.15	13.61	8.13	1.39	0.13	1.15	bld	0.46	bld	0.13	0.01	5.81	99.98	148.7
	NGTR-04	high	amphibolite	Al-goethite	gibbsite	kaolinite		27.76	20.25	23.16	0.08	5.08	0.13	0.06	0.38	1.32	bld	2.72	bld	1	0.07	16.72	98.79	74.6
	NGTR-05	high	amphibolite	Al-goethite	gibbsite	kaolinite		24.89	19.63	32.7	0.28	1.2	0.1	0.02	bld	2.2	bld	0.91	0.02	0.85	0.12	16.46	99.43	261
	NGTR-06	high	amphibolite	Al-goethite	gibbsite	kaolinite		26.28	20.88	29.8	0.27	1.02	0.11	0.02	bld	2.21	bld	0.87	0.02	0.73	0.1	16.37	98.72	184
	NGTR-07	high	dunite	goethite	hematite	lizardite		12.45	5.56	60.09	0.91	1.13	0.07	bld	bld	0.2	bld	1.59	0.13	2.6	0.52	14.53	99.83	65
	OPB7-03	very high	harzburgite	goethite	hematite			0.87	6.64	72.95	0.33	0.47	bld	bld	bld	0.08	bld	0.41	0.02	3.8	0.7	14.3	100.58	80
	OPB7-06	very high	harzburgite	goethite	hematite			2.2	8.18	61.87	3.65	1.04	bld	bld	bld	0.02	bld	1.01	0.7	4.26	0.77	16.9	100.62	93
	OPB7-07	very high	harzburgite	goethite	hematite			2.49	6.76	66.38	1.35	0.82	bld	bld	bld	0.01	bld	1.03	0.22	3.76	0.82	17	100.65	86
	OPB7-08	very high	harzburgite	goethite	hematite			2.35	6.95	67.64	1.06	0.77	bld	bld	bld	0.03	bld	1.12	0.13	2.73	0.85	17.1	100.74	94
	OPB7-09	very high	harzburgite	goethite	hematite			3.15	6.5	66.52	1.08	0.95	bld	bld	bld	0.01	bld	1.09	0.16	2.89	0.77	17.5	100.63	72
	OPB7-10	very high	harzburgite	goethite	hematite			4.35	5.34	68.09	0.89	1.19	bld	0.01	bld	0.01	bld	1.1	0.12	2.28	0.65	16.5	100.54	75
	OPB7-10.7	very high	harzburgite	goethite	hematite			4.21	6.6	62.84	1.86	2.12	0.03	bld	bld	bld	bld	1.24	0.29	5.13	0.4	14.99	99.74	67.9
	OPB7-2.3	very high	harzburgite	goethite	hematite			1.14	5.76	72.69	0.31	0.37	0.08	bld	bld	0.05	bld	0.57	0.02	3.53	0.72	15.23	100.49	93.6
	OPB7-5.8	very high	harzburgite	goethite	hematite			3.78	9.52	61.27	1.21	2.11	0.03	bld	bld	0.03	bld	0.95	0.2	4.62	0.65	15.38	99.76	94.2
	PZ2B-09	very high	harzburgite	goethite	hematite			4.13	4.36	66.57	1.33	1.15	0.03	bld	bld	0.03	bld	1.92	0.15	3.72	0.4	15.88	99.7	57.8
	TIAS-01	unweathered	gabbro	hornblende	plagioclase			44.97	14.92	7.92	0.11	10.91	13.04	1.04	0.06	0.82	bld	0.03	bld	bld	0.01	6.26	100.12	82.1
	TIAS-01-PX	unweathered	amphibole	hornblende				45.22	8.31	13.68	0.16	14.21	9.23	1.25	0.11	1.47	bld	0.07	0.1	0.03	0.01	5.54	99.42	167.4
	TIAS-05	unweathered	gabbro	hornblende	plagioclase			41.99	15.96	11.5	0.14	9.23	6.14	0.55	0.08	0.28	bld	0.06	0.01	0.05	0.01	12.87	98.9	47.1
	TIEA-08	high	lherzolite	nontronite				38.23	8.42	23.36	0.04	3.52	0.1	bld	bld	0.11	bld	1.41	0.02	3.75	0.02	20.8	99.82	80
	TIEA-12	very high	lherzolite	Al-goethite	hematite			2.15	10.28	66.23	1.31	1.13	0.08	bld	bld	0.08	bld	1.32	0.3	3.4	0.35	13.71	100.39	96.5
	TIFT-03	very high	lherzolite	goethite	hematite			2.34	4.83	71.86	0.05	0.6	0.03	bld	bld	0.03	bld	1.54	0.01	4.51	0.12	13.8	99.76	71.7
	TP65-2.2	very high	harzburgite	goethite	hematite			2.76	3.03	68.08	2.35	0.7	0.03	bld	0.05	0.02	bld	1.94	0.35	4.36	0.55	15.98	100.24	48
	TP65-6.0	very high	harzburgite	goethite	hematite			2.93	4.96	65.48	1.43	0.67	0.05	bld	bld	bld	bld	2.52	0.45	3.48	0.5	17.32	99.81	65.1
	TP65-6.4	very high	harzburgite	goethite	hematite			3.83	5.03	63.81	1.27	1.09	0.04	bld	bld	bld	bld	1.78	0.42	5.2	0.35	16.86	99.71	64.3
	MIXED SAMPLES
	BS-2014-06C (0.8)						BS-2014-06C*0.8 + BS-2014-07*0.2	31.77	9.52	33.01	0.49	8.58	2.28	0.13	bld	0.68	bld	0.18	0.02	0.69	0.01	12.2	99.64	204.6
	BS-2014-06C (0.2)						BS-2014-06C*0.2 + BS-2014-07*0.8	30.45	4.77	65.22	2.47	1.12	0.12	bld	bld	0.1	bld	1.83	0.36	3.31	0.56	15.8	101	239.9
	NGTR-05 (0.7)						NGTR-05*0.7 + NGPB-03*0.3	22.64	20.91	32.48	0.5	0.9	0.08	bld	bld	2.23	bld	0.8	0.05	0.84	0.18	17.82	99.54	277.1
	NGTR-05 (0.3)						NGTR-05*0.3 + NGPB-03*0.7	19.64	22.61	32.19	0.81	0.51	0.06	bld	bld	2.27	bld	0.65	0.11	0.83	0.28	19.63	99.68	298.6
	NAME-08 (0.8)						NAME-08*0.8 + TIAS-05*0.2	16.63	7.97	45.33	3.91	3.19	1.3	0.45	bld	0.12	bld	4.43	20.78	2.3	0.4	12.64	80.03	56.9
	TIEA-12 (0.5)						TIEA-12*0.5 + NGPB-10*0.5	19.03	9.23	49.44	0.91	3.05	1.02	bld	bld	0.47	bld	1.28	0.18	2.37	0.23	12.48	99.95	107
	TIEA-12 (0.7)						TIEA-12*0.7 + BS-2014-06C*0.3	11.16	8.99	56.9	1.08	3.86	0.89	bld	bld	0.16	bld	0.96	0.21	2.62	0.24	12.91	100.12	125.4
	TIEA-12 (0.4) bis						TIEA-12*0.4 + NGPB-10*0.6	22.41	9.02	46.08	0.83	3.43	1.2	bld	bld	0.54	bld	1.27	0.16	2.16	0.21	12.23	99.86	133.7
	TIEA-12 (0.4)						TIEA-12*0.4 + BS-2014-06C*0.6	20.18	7.71	47.57	0.85	6.6	1.7	bld	bld	0.24	bld	0.61	0.13	1.84	0.14	12.12	99.85	154.3
	NGRI-05 (0.4)						NGRI-05*0.4 + BS-2014-06D*0.6	27.03	9.12	39.08	0.51	7.59	3.41	0.58	bld	0.66	bld	0.32	0.02	0.55	0.01	10.44	99.44	156.5
	BS-2014-07(0.3)						BS-2014-07*0.3 + NGPB-10*0.7	34.14	12.8	30.21	0.43	4.06	1.44	0.28	0.04	1.2	bld	0.95	0.05	1.01	0.09	12.9	99.72	157.7
	NGRI-05 (0.4) bis						NGRI-05*0.4 + NGPB-02*0.6	29.46	16.34	26.96	0.17	6.57	3.55	0.61	bld	1.41	bld	0.41	bld	1.08	0.04	13.31	100.04	162.5
	NGRI-05 (0.4) tris						NGRI-05*0.4 + NGPB-02*0.6	29.46	16.34	26.96	0.17	6.57	3.55	0.61	bld	1.41	bld	0.41	bld	1.08	0.04	13.31	100.04	162.5
	NGPB-10 (0.6)						NGPB-10*0.6 + BS-2014-07*0.4	33.55	14.35	29.4	0.41	3.75	1.27	0.25	0.05	1.32	bld	0.86	0.05	0.9	0.09	13.45	99.79	171.1
	NGPB-03 (0.7)						NGPB-03*0.7 + NGRI-05*0.3	25.21	20.21	26.55	0.77	4.23	2.47	bld	bld	1.96	bld	0.52	0.1	0.62	0.24	16.44	99.85	264.9
	NGPB-03 (0.8)						NGPB-03*0.8 + NGRI-05*0.2	22.6	21.44	28.36	0.86	2.89	1.66	bld	bld	2.07	bld	0.53	0.12	0.69	0.28	17.96	99.83	281.5
	bld = below detection limit
	Fe2O3T = Total Fe expressed as Fe2O3
	Table B: Synthesis of the mineralogical and geochemical characteristics of the samples analysed in this study.
